# Supplementary material for: Identification of Potential Targets Linked to the Cardiovascular/Alzheimer’s Axis through Bioinformatics Approaches
Source: MDPI journal article supplement (doi:10.3390/biomedicines10020389), 2022-02-06
Supplement: s1 [file s1]

## Supplementary Materials

### Supplementary Methods

#### Protein study for validation of the bioinformatic results

##### *Protein extraction*

Samples corresponding to 45 sections of femoral artery tissue were diluted in 500  $\mu$ L of lysis buffer containing 20 mM Tris HCl pH 7.6, 10 mM NaCl, 1 mM EDTA, 4% SDS, 30% glycerol, 5 mM PMSF, 200 mM DTT and benzonase (1  $\mu$ L for each 10mL). The mixture was homogenized at 4°C by applying shear stress via a horn sonicator at 20% of amplitude and 7 cycles for 40s separated by a 20 s pause, in a Bandelin Sonoplus HD2070 sonicator and Bandelin UW 2070 horn tip. The obtained homogenate was centrifuged for 20 min at 4°C and 6000 rpm. The supernatant was decanted to a new vial and stored as cytosolic fraction at -80 °C.

##### *Sample processing*

Samples were prepared and analyzed in the Proteomics Facility at Research Support Central Service, University of Cordoba. Protein extracts were cleaned-up in 1D SDS-PAGE at 10% polyacrylamide. Previously, samples were concentrated by ultrafiltration using Amicon Ultra-0.5 Centrifugal Filter spin column with a cutoff of 3kDa. Then, samples were loaded onto the stacking gel and 100V was applied until the electrophoresis front reached the resolving gel. The run was stopped when the protein extract had entered 1 cm into the resolving gel and the gel was stained with Coomassie Blue. Proteins bands were cut off, diced and kept in water until digestion.

For protein digestion, gel dices were destained in 200 mM ammonium bicarbonate (AB)/50% acetonitrile for 15 min followed by 5 min in 100% Acetonitrile. Protein was reduced by the addition of 20 mM dithiothreitol in 25 mM AB and incubated for 20 min at 55°C. The mixture was cooled down to room temperature, followed by alkylation of free thiols by addition of 40 mM iodoacetamide in 25 mM AB, in the dark for 20 min and the gel pieces were then washed twice in 25 mM AB. Proteolytic digestion was performed by the addition of 12.5 ng/ $\mu$ L Trypsin (Promega, Madison, WI, EE.UU.) in 25 mM AB and incubated at 37°C overnight. Protein digestion was stopped by the addition of trifluoroacetic acid at 1% final concentration and the digested samples were finally Speedvac dried.

##### *Nano-scale liquid chromatographic tandem mass spectrometry (nLC-MS/MS) Analysis*

Nano-LC was performed in a Dionex Ultimate 3000 nano UPLC (Thermo Fisher Scientific) with a c18, 3  $\mu$ m, 100A, 75  $\mu$ m i.d.  $\times$  50 Acclaim Pepmap100 column, nanoViper (Thermo Fisher Scientific). The peptide mix was previously loaded on a 300  $\mu$ m  $\times$  5mm Acclaim Pepmap precolumn (Thermo Fisher Scientific) in 2% acetonitrile/0.05% trifluoroacetic (TFA) for 5 min at 5  $\mu$ L/min. Peptide separation was performed at 40°C for all runs. Mobile phase buffer A was composed of water, 0.1% formic acid. Mobile phase B was composed of 20% acetonitrile, 0.1% formic acid. Samples were separated at 300 nL/min. Elution conditions were: 4-35 % B for 120 min; 35-55 % B for 6 min; 55-90 % B for 3 min followed by 8 min wash at 90% B and a 15 min re-equilibration at 4% B. Total time of chromatography was 150 min.

Eluting peptide cations were converted to gas-phase ions by nano electrospray ionization and analyzed on a Thermo Orbitrap Fusion (Q-OT-qIT, Thermo Fisher Scientific) mass spectrometer operated in positive mode. Survey scans of peptide precursors from 400 to 1500 m/z were performed at 120,000 FWHM resolutions with 4  $\times$  10<sup>5</sup> ion count target. Tandem mass spectrometry was performed by isolation at 1.2 Da with the quadrupole, CID fragmentation

with normalized collision energy of 35, and rapid scan mass spectrometry analysis in the ion trap. The Automatic gain control ion count target was set to  $2 \times 10^3$  and the max injection time was 300 ms. Only those precursors with charge state 2-5 were sampled for MS/MS. The dynamic exclusion duration was set to 15 s with a 10 ppm tolerance around the selected precursor and its isotopes. Monoisotopic precursor selection was turned on. The instrument was run in top 30 mode with 3 s cycles, meaning the instrument would continuously perform MS/MS events until a maximum of top 30 non-excluded precursors or 3s, whichever is shorter.

### *Protein Identification*

The raw data were processed using Proteome Discoverer (version 2.1.0.81, Thermo Fisher Scientific). MS/MS spectra were searched with SEQUEST<sup>TM</sup>6 engine (Thermo Fisher Scientific) against Uniprot *Homo sapiens* database ([www.uniprot.org](http://www.uniprot.org)). Peptides were generated by theoretical tryptic digestion allowing up to one missed cleavage, carbamidomethylation of cysteines as fixed modification and oxidation of methionine as post-translational variable modification. Precursor mass tolerance was 10 ppm and product ion were searched at 0.1 Da tolerance. Peptide spectral matches were validated using percolator based on q-values at 1% False discovery rate (FDR). With proteome Discoverer, the filtering threshold was 1% FDR for protein identification and minimal 1 peptide and 95% probability for peptide identification.

Unrecognized identifiers were manually curated using UniProtKB query main box. Any dubious association was dismissed and not further considered in downstream bioinformatics analysis.

**Supplementary Table S1.** DEGs identified between normal artery vs atherosclerotic artery using GEO2R.

| Gene symbol | Gene name                                   | Log FC | Adj. <i>p</i> -value | Sequence                                                         |
|-------------|---------------------------------------------|--------|----------------------|------------------------------------------------------------------|
| MMP9        | matrix metalloproteinase 9                  | 4,110  | 1,63E-10             | TGGAGGTGGGCTGGGCCCTCTCTCTCACCTTTGTTTTTGTGGAGTGTT<br>TCTAATAAA    |
| CCL18       | chemokine ligand 18                         | 4,110  | 2,20E-09             | ACATTCAATGCATGGATCAATCAGTGTGATTAGCTTTCTCAGCAGACATT<br>GTGCCATATG |
| ACP5        | acid phosphatase 5, tartrate<br>resistant   | 3,900  | 1,02E-10             | TTTGCTGAGTTCGGGGGTGCAATGGGGGAGGGAGGGAGGGAAAGCTTC<br>CTCCTAAATCAA |
| -           | -                                           | 3,260  | 9,07E-07             | AGCAGACTACGAGAAAACAAAGTCTACGCCTGCGAAGTCACCCATCAG<br>GGCCTGAGCTC  |
| -           | -                                           | 3,110  | 4,36E-07             | AAACCCACCCATGTCAATGTGTCTGTTGTCATGGCGGAGGTGGACGGCA<br>CCTGCTACTGA |
| -           | -                                           | 3,090  | 4,61E-06             | CATGAGGCTCTGCACAACCACTACACACAGAAGAGCCTCTCCCTGTCTCC<br>GGGTAAATGA |
| IGLL5       | immunoglobulin lambda-like<br>polypeptide 5 | 3,040  | 2,18E-06             | TAGTGTGTCTGATCAGTGACTTCTACCCGGGAGCTGTGACAGTGGCCTGG<br>AAGGCAGATG |
| HBA2        | hemoglobin, alpha 2                         | 2,940  | 9,98E-08             | TTCCTGGCTTCTGTGAGCACCGTGCTGACCTCCAAATACCGTTAAGCTGG<br>AGCCTCGGTA |
| HBA2        | hemoglobin, alpha 2                         | 2,930  | 1,23E-07             | GGCTTCTGTGAGCACCGTGCTGACCTCCAAATACCGTTAAGCTGGAGCCT<br>CGGTAGCCGT |
| -           | -                                           | 2,910  | 2,00E-06             | AAAGCAACAACAAGTACGCGGCCAGCAGCTATCTGAGCCTGACGCCTGA<br>GCAGTGGAAGT |
| -           | -                                           | 2,880  | 2,21E-06             | AGCCAACAAGGCCACACTGGTGTGCCTGATCAGTGACTTCTACCCGGGA<br>GCTGTGAAAGT |
| HBA2        | hemoglobin, alpha 2                         | 2,870  | 2,93E-07             | CACAGACTCAGAGAGAACCCACCATGGTGCTGTCTCCTGCCGACAAGAC<br>CAACGTCAAGG |
| -           | -                                           | 2,750  | 6,26E-06             | AAGATAGCAGCCCCGTCAAGCGGGAGTGGAGACCACCACACCCTCCAA<br>ACAAAGCAACAA |
| -           | -                                           | 2,560  | 4,53E-06             | ATACGAGTAGTGATCAACCGGTTTTCGGCGGAGGGACCAAGCTGACCGT<br>CCTAGGTCAAG |
| IGLL1       | immunoglobulin lambda-like<br>polypeptide 1 | 2,530  | 2,61E-06             | AACAAGGCCACACTGGTGTGTCTCATGAATGACTTCTATCTGGGAATCTT<br>GACGGTGACC |
| HBD         | hemoglobin, delta                           | 2,520  | 2,56E-06             | TGATGGCCTGGCTCACCTGGACAACCTCAAGGGCACTTTTCTCAGCTGA<br>GTGAGCTGCA  |

|        |                               |       |          |                                                                  |
|--------|-------------------------------|-------|----------|------------------------------------------------------------------|
| -      | -                             | 2,470 | 5,24E-06 | CCATCAGCAGCCTGCAGTCTGAAGATTTTGCAGTTTATTACTGTCAGCAG<br>TATAATAACT |
| CCL3   | chemokine ligand 3            | 2,460 | 1,32E-07 | TGCTTTTGTTCAGGGCTGTGATCGGCCTGGGGAAATAATAAAGATGCTCT<br>TTTAAAAGGT |
| IBSP   | integrin-binding sialoprotein | 2,280 | 5,70E-06 | TATACAGGGTTAGCTGCAATCCAGCTTCCCAAGAAGGCTGGGGATATAA<br>CAAACAAAGCT |
| APOC1  | apolipoprotein C-I            | 2,250 | 1,88E-04 | GTTTTCAGAGACATTTAGAAAAGTGAAGGAGAACTCAAGATTGACTCAT<br>GAGGACCTGA  |
| SPP1   | secreted phosphoprotein 1     | 2,240 | 1,87E-05 | TTCCACAGCCATGAATTTACAGCCATGAAGATATGCTGGTTGTAGACCC<br>CAAAAGTAAG  |
| -      | -                             | 2,240 | 6,78E-05 | TGAATGGCAAGGAGTACAAGTGCAAGGTCTCCAACAAAGCCCTCCCAGC<br>CCCCATCGAGA |
| MMP12  | matrix metalloproteinase 12   | 2,240 | 9,68E-05 | TTGTCCATTCTTGCTTGACTCTACTATTAAGTTTGAAGTACCTTCAA<br>AGGCCAAG      |
| CCL4   | chemokine ligand 4            | 2,220 | 1,06E-07 | AAGTCTGTGCTGATCCCAGTGAATCCTGGGTCCAGGAGTACGTGTATGAC<br>CTGGAACTGA |
| HMOX1  | heme oxygenase 1              | 2,220 | 1,07E-07 | TGGGGAGGGAGGTGTTTAACGGCACTGTGGCCTTGGTCTAACTTTTGTGT<br>GAAATAATAA |
| -      | -                             | 2,220 | 3,68E-05 | ACATCCAGATGACCCAGTCTCCATCCTCCCTGTCTGCATCTGTAGGAGGC<br>AGAGTCACCA |
| -      | -                             | 2,200 | 5,53E-06 | AGCAGCCTGCAGCCTGAAGATTTTGCAGTTTATTACTGTCAGCAGGATTA<br>TAACTTACCT |
| -      | -                             | 2,200 | 1,13E-05 | GGCAGCGGATATGGAAGAGATTTCACTCTCACTGTCAGCAGCCTGCAGC<br>CTGAAGATTTT |
| CD52   | CD52 molecule                 | 2,190 | 2,16E-08 | TGCCAGACATCACCAGGTTGTAGAAGTTGACAGGCAGTGCCATGGGGGC<br>AACAGCCAAAA |
| CCL4   | chemokine ligand 4            | 2,140 | 4,91E-07 | CAGGAAGTCTTCAGGGAAGGTACCTGAGCCCGGATGCTTCTCCATGAG<br>ACACATCTCCT  |
| -      | -                             | 2,140 | 2,51E-05 | GTGGCACATACTATGCAGACTCCGTGAAGGGCCGATTACCATCTCCAG<br>AGACAATGCCA  |
| -      | -                             | 2,120 | 5,76E-05 | GACAGAGTCACCATCACTTGTGCGGCGAGTCAGGGAATTAGCAATTATTT<br>AGCCTGGTTT |
| -      | -                             | 2,120 | 9,51E-05 | GGGATGAGGCCGACTATTACTGTCAGGTGTGGGATAGTAGTAGTGATCA<br>TCCCACGGTGA |
| PLA2G7 | phospholipase A2, group VII   | 2,100 | 5,49E-07 | AAAGCATTTAGGACTTCATAAAGATTTTGATCAGTGGGACTGCTTGATTG<br>AAGGAGATGA |

|             |                                                                  |              |                 |                                                                          |
|-------------|------------------------------------------------------------------|--------------|-----------------|--------------------------------------------------------------------------|
| -           | -                                                                | 2,100        | 3,65E-05        | CTCTCCTGCAGGGCCAGTCAGAGTGTTAGCGGCATCTACTTAGCCTGGTA<br>CCAGCAGAAA         |
| -           | -                                                                | 2,050        | 2,79E-05        | CTCCAGGCTGAGGACGAGGCTGATTATTACTGCTGCTCATATGCAGGTAG<br>TAGCACTTTC         |
| HBB         | hemoglobin, beta                                                 | 2,030        | 8,14E-06        | GTCCAACTACTAACTGGGGGATATTATGAAGGGCCTTGAGCATCTGGAT<br>TCTGCCTAAT          |
| CCL3L3      | chemokine ligand 3-like 3                                        | 2,020        | 7,21E-08        | TTCCACAGAATTTTCATAGCTGACTACTTTGAGACGAGCAGCCAGTGCTCC<br>AAGCCCAAGTG       |
| LILRB4      | leukocyte immunoglobulin-like<br>receptor, subfamily B, member 4 | 2,010        | 4,26E-08        | AAATATTACACATCAAACCAATGACATGGGAAAATGGGAGCTTCTAATGA<br>GGACAAACAA         |
| <b>APOE</b> | <b>apolipoprotein E</b>                                          | <b>2,010</b> | <b>2,11E-05</b> | <b>CGCCCCAGCCGTCCTCCTGGGGTGGACCCTAGTTTAATAAAGATTCACCA<br/>AGTTTCACGC</b> |
| NCF1        | neutrophil cytosolic factor 1                                    | 2,000        | 2,31E-10        | GCCGAGCGCCGACCTCATCCTGAACCGCTGCAGCGAGAGCACCAAGCG<br>GAAGCTGGCGTC         |
| SLAMF8      | SLAM family member 8                                             | 2,000        | 2,11E-08        | TGCACCAGGGCCTTGTTGAACAGATCCCACTGCTCTAATAAAGTTCCCA<br>TCCTTAATGA          |
| -           | -                                                                | 2,000        | 1,50E-05        | TCCGGTCCGAGGATGAGGCTGATTATTACTGTGCAGCATGGGATGACAG<br>CCTGAGTGGTC         |
| -           | -                                                                | 2,000        | 3,79E-05        | CATCACTGGTCTCCAGGCTGAGGACGAGGCTGATTATTACTGCAGCTCAT<br>ATACAAGCAG         |
| ITGAX       | integrin, alpha X                                                | 1,990        | 5,88E-09        | TTCATCGTGGGGCTCTCAGTTCGATTCCCCAGGCTGAATTGGGAGTGAG<br>ATGCCTGCAT          |
| C16orf54    | chromosome 16 open reading<br>frame 54                           | 1,970        | 2,55E-12        | GTATCACTTCTGTAAATGGAAAACCAGTCTCATTTGCCATCAATAGAAGG<br>TAAAACATGA         |
| AMICA1      | adhesion molecule, interacts with<br>CXADR antigen 1             | 1,960        | 4,22E-11        | CTCCTGTGGGCAGGGTTCTTAGTGGATGAGTTACTGGGAAGAATCAGAG<br>ATAAAAAACCAA        |
| MARCO       | macrophage receptor with<br>collagenous structure                | 1,960        | 1,32E-04        | TGGCTGGATAATGTTCAAGTGTCGGGGCACGGAGAGTACCCTGTGGAGCT<br>GCACCAAGAAT        |
| ADAM8       | ADAM metalloproteinase domain 8                                  | 1,950        | 1,47E-06        | TATGTGGGAGAGTCAGCTATCTTGTCTGGTTTTCTTGAGACCTCAGATGTG<br>TGTTCAAGCA        |
| LOC96610    | BMS1 homolog, ribosome assembly<br>protein pseudogene            | 1,950        | 3,70E-05        | ATTTATGACAATAATAAGCGACCCTCAGGGATTCTGACCGATTCTCTGG<br>CTCCAAGTCT          |
| TBC1D10C    | TBC1 domain family, member 10C                                   | 1,940        | 2,25E-10        | GGAAGGGGTTGGCTGAGTCAAGGGACCCAGAGGGCACCAGGAATAAA<br>ATCTTCTTGAAC          |
| SLC37A2     | solute carrier family 37, member 2                               | 1,930        | 6,92E-08        | TAGCTCTTGGCATCTCCATCTGAGCCTAAAGTTGCCCACTGGCACCAATA<br>GATTCTGTTT         |

|              |                                                          |       |          |                                                                    |
|--------------|----------------------------------------------------------|-------|----------|--------------------------------------------------------------------|
| MMP7         | matrix metalloproteinase 7                               | 1,920 | 2,16E-04 | TTGGGTATGGGACATTCTCTGATCCTAATGCAGTGATGTATCCAACCTAT<br>GGAAATGGA    |
| IFI30        | interferon, gamma-inducible protein<br>30                | 1,910 | 1,32E-07 | ATGAAGCCAGATACACAAAATTCCACCCCTAGATCAAGAATCCTGCTCC<br>ACTAAGAATG    |
| -            | -                                                        | 1,910 | 3,22E-05 | GGTGGTTATAACTATGTCTCCTGGTACCAACAGCACCCAGGCCAAAGCCCC<br>CAAACCTCATG |
| -            | -                                                        | 1,900 | 1,67E-04 | GATTTTACACTGAAAATCAGCAGAGTGGAGGCTGAGGATGTTGGGGTTT<br>ATTACTGCATG   |
| SLAMF7       | SLAM family member 7                                     | 1,890 | 1,53E-10 | GGAGACCTCCCTACCAAGTGATGAAAGTGTTGAAAACTTAATAACAAAT<br>GCTTGTTGGG    |
| CD2          | CD2 molecule                                             | 1,890 | 2,27E-09 | GAGTTTCTTATGTGCCCTGGTGGACACTTGCCACCATCCTGTGAGTAA<br>AGTGAAATAA     |
| -            | -                                                        | 1,890 | 4,08E-05 | TGATCTATGCTGCATCCAGTTTGCAGTCGGGGTCCCATCTCGGTTCACT<br>GGCAGTGGAT    |
| MPEG1        | macrophage expressed 1                                   | 1,860 | 1,70E-10 | CTAACCACTTGTCTGCAAGTACTGACTTTCCTATGAATTCTTGAAGATTA<br>TTGAGTCAG    |
| TNFRSF25     | tumor necrosis factor receptor<br>superfamily, member 25 | 1,860 | 1,06E-07 | CGAGAGGGGGTGAAGACATTTCTCAACTTCTCGGCCGGAGTTTGGCTGA<br>GATCGCGGTAT   |
| IL1RN        | interleukin 1 receptor antagonist                        | 1,860 | 2,32E-05 | TGCAAAGTTCCCTACTTCTGTGACTTCAGCTCTGTTTACAATAAAATCTT<br>GAAAATGC     |
| NFAM1        | NFAT activating protein with ITAM<br>motif 1             | 1,840 | 1,91E-09 | CATATGTGGGTGACAGAAGCATATGTTACAGTGAAACATTAATACTACAG<br>CAAAGTGAAA   |
| -            | -                                                        | 1,830 | 5,29E-05 | ATCTCTTGTCTGGAAGCAGCTCCAACATCGGAAGTAATACTGTAACTG<br>GTACCAGCAG     |
| LOC100653210 | ig kappa chain V-III region VG-like                      | 1,820 | 5,91E-05 | TGGTACCAACAGAAACCTGGCCAGGCTCCCAGGCTCCTCATCTATGATGC<br>ATCCAACAGG   |
| NCF1         | neutrophil cytosolic factor 1                            | 1,810 | 1,31E-09 | AGACGACGTCACAGGCTACTTCCCGTCCATGTACCTGCAAAAGTCAGGG<br>CAAGACGTGTC   |
| CECR1        | cat eye syndrome chromosome<br>region, candidate 1       | 1,800 | 8,78E-08 | TAATCGGATATTTATTTCTGTGTCTACAGTCTTGCCCTGCCAGACTGTATG<br>CCCCATGTG   |
| IL4I1        | interleukin 4 induced 1                                  | 1,800 | 3,44E-06 | AAGGCCAGTTATCTCTCCAAAACACGACCCACACGAGGACCTCGCATT<br>AAGTATTTTCG    |
| PLCB2        | phospholipase C, beta 2                                  | 1,780 | 1,42E-09 | GACAAGGTCAGCATCATTTGCTCTCCTGAATTTATGAGGTTTATTTATTTT<br>CTCTTTCC    |
| FOLR2        | folate receptor 2                                        | 1,770 | 9,72E-10 | CCTTAAGCATGCTTCTATTAGTCACCTAACCTCTGTCAACCCAGTCTGTTG<br>CTGCTCCAT   |

|          |                                                                |       |          |                                                                  |
|----------|----------------------------------------------------------------|-------|----------|------------------------------------------------------------------|
| SAP25    | Sin3A-associated protein, 25kDa                                | 1,770 | 2,08E-08 | CTTCTCAGGGCAGAGTGGGCTGGTTGTGTTGACAATAAAACAGTGTGGT<br>TTGCAAAAAA  |
| IL10RA   | interleukin 10 receptor, alpha                                 | 1,760 | 1,56E-10 | CTGACTTGTCTAATTCATAGGGATGTGAGGTTCTGCTGAGGAAATGGGTA<br>TGAATGTGCC |
| CSF1R    | colony stimulating factor 1 receptor                           | 1,740 | 1,56E-10 | ATCCTAACTAACAGTCACGCCGTGGGATGTCTCTGTCCACATTAACTAA<br>CAGCATTAAT  |
| CHI3L1   | chitinase 3-like 1                                             | 1,740 | 1,82E-03 | TCCTTATCAAAGGACACCATTTTGGCAAGCTCTATCACCAAGGAGCCAAA<br>CATCCTACAA |
| -        | -                                                              | 1,730 | 5,57E-08 | ATCCTCTATGAGATCTTGCTAGGGAAGGCCACCTTGATGCCGTGCTGGT<br>CAGTGCCCTC  |
| TRAF3IP3 | TRAF3 interacting protein 3                                    | 1,720 | 2,46E-10 | TTTGTGACAACTGCCTTGGGTGAAAATCAGAAGCAAGCAACTCAGCGAA<br>AAACTCAGAAG |
| MYO1F    | myosin IF                                                      | 1,720 | 7,67E-10 | ATTTCTGTGTGTGTCAAAGGGGACTAACAGCAGAATCTACCTCCCACTG<br>CCATGTGATT  |
| CSF3R    | colony stimulating factor 3 receptor                           | 1,720 | 1,70E-06 | TCCATCCAGCCCCACCCAATGGCCTTTTGTGCTTGTTCCTATAACTTCAG<br>TATTGTAAA  |
| CCR1     | chemokine receptor 1                                           | 1,710 | 1,66E-07 | CTTTTCAAGTTGGGTGATATGTTGGTAGATTCTAATGGCTTTATTGCAGCG<br>ATTAATAAC |
| ITGB2    | integrin, beta 2                                               | 1,700 | 1,39E-08 | GCCAATTTATTTACATTTAACTTGTGAGGGTATAAAATGACATCCCATTA<br>ATTATATTG  |
| STAB1    | stabilin 1                                                     | 1,690 | 3,11E-09 | GTGGTTAGCCGTATCATTGTGTGGGACATCATGGCCTTCAATGGCATCAT<br>CCATGCTCTG |
| S1PR4    | sphingosine-1-phosphate receptor<br>4                          | 1,690 | 3,74E-09 | AGGCTGCAAGGGGTGGACTGTGGGATGCATGCCCTGGCAACATTGAAGT<br>TCGATCATGGT |
| SLCO2B1  | solute carrier organic anion<br>transporter family, member 2B1 | 1,690 | 4,62E-08 | TGCTGGTTGGTATCTGTAAATGTTTAATAAATATCTGAGCATGTATCTATC<br>AACGCCAAG |
| CD163L1  | CD163 molecule-like 1                                          | 1,680 | 1,96E-10 | AATCACTGAATGCCTCCTCAGGTCATTTAGCACTTATTTTATCCAGTATCTT<br>TGGGCTCC |
| IL7R     | interleukin 7 receptor                                         | 1,680 | 5,02E-07 | CATCCTGCTTCTACCATGTGGATTTGGTCACAAGGTTTAAGGTGACCCAA<br>TGATTGAGCT |
| EGR2     | early growth response 2                                        | 1,670 | 7,24E-08 | AAGAATGTACATAATGTTACCGGAGCTGATTTGTTTGGTCATTAGCTCTTA<br>ATAGTTGTG |
| -        | -                                                              | 1,670 | 4,84E-05 | TTCACCATCTCCAGAGACAATTCCAAGAACACGCTGTATCTGCAAATGAA<br>CAGCCTGAGA |
| -        | -                                                              | 1,670 | 2,66E-04 | CTGGGTTCCGCCAGGCTCCAGGGAAGGGACTGGAGTGGGTTTCATACATT<br>AGTGGAATAG |

|         |                                                                                                 |       |          |                                                                   |
|---------|-------------------------------------------------------------------------------------------------|-------|----------|-------------------------------------------------------------------|
| -       | -                                                                                               | 1,660 | 7,35E-05 | TTGCCTGCAGTCTGAAGATTTTGCAACTTATTACTGTCAACAGTATTATAG<br>TTTCCCTCC  |
| FCGR3A  | Fc fragment of IgG, low affinity IIIa,<br>receptor                                              | 1,650 | 2,22E-08 | TGCAGGGACTGTAAAACCACCTTTTCTGCTTCAATATCTAATTCCTGTGTA<br>GCTTTGTTC  |
| LAIR1   | leukocyte-associated<br>immunoglobulin-like receptor 1                                          | 1,650 | 3,49E-08 | GGGGCAGTTGCTAATTTAGTTCTAGGCAAACGTGGACACATTAAATTCTC<br>CTACAAACCC  |
| COL1A1  | collagen, type I, alpha 1                                                                       | 1,650 | 1,86E-06 | GGTGGGAGGAAGCAAAAGACTCTGTACCTATTTTGTATGTGTATAATAAT<br>TTGAGATGTT  |
| RASAL3  | RAS protein activator like 3                                                                    | 1,640 | 1,50E-10 | ACAGTGGGGAGTGGAGCTGCTGGTCCCAACCACTCTGGCAGTATGAAGT<br>TGCCCAAGTAAA |
| CD83    | CD83 molecule                                                                                   | 1,640 | 1,08E-05 | GCAGAAGGGACTTCACGAAGTGTGCATGGATGTTTTAGCCATTGTTGGC<br>TTTCCCTTAT   |
| ADAP2   | ArfGAP with dual PH domains 2                                                                   | 1,630 | 8,57E-10 | AATGGAGGCATTGCAATGAAAAGGCACCCACAGCATCATGCAAGTGGCA<br>TCTTGTAATAAA |
| ITGB7   | integrin, beta 7                                                                                | 1,630 | 1,09E-08 | CACCCTACTTCATTTTCAGAGTGACACCCAAGAGGGCTGCTTCCCATGCC<br>TGCAACCTTG  |
| CCL3L3  | chemokine ligand 3-like 3                                                                       | 1,630 | 2,44E-06 | AAGAGTAGTCAGTCCCTTCTTGGCTCTGCTGACACTCGAGCCACATTCC<br>ATCACCTGCT   |
| HMHA1   | histocompatibility HA-1                                                                         | 1,620 | 1,53E-10 | CCACCGTGTGGTTCTTTCACAGGCACGTTTATTTTGCTGAAATAAAAAAGTT<br>TTTAATCGG |
| LILRA6  | leukocyte immunoglobulin-like<br>receptor, subfamily A, member 6                                | 1,620 | 7,35E-07 | CCAGATTCATCTGTGTTGCTGAACATGGTACAATTCCTTCTTTTATGCCT<br>GAATATTA    |
| FBP1    | fructose-1,6-bisphosphatase 1                                                                   | 1,620 | 7,43E-06 | TAATGCCACTGGTGTTAAGATATATTTTGAGTGGATGGAGGAGAAATAAA<br>CTTATTCCTC  |
| LGALS2  | lectin, galactoside-binding, soluble,<br>2                                                      | 1,620 | 3,76E-05 | CTGAGCTACCTGAGCGTAAGGGGCGGGTTCAACATGTCCTCTTCAAGTT<br>AAAAGAATAA   |
| CCR5    | chemokine receptor 5                                                                            | 1,610 | 4,22E-10 | AACAGTAGCATAGGACCCTACCCTCTGGGCCAAGTCAAAGACATTCTGA<br>CATCTTAGTAT  |
| CCL5    | chemokine ligand 5                                                                              | 1,600 | 2,41E-07 | AGATGAGCTAGGATGGAGAGTCCTTGAACCTGAACCTACACAAATTTGCC<br>TGTTTCTGCT  |
| ANXA8L2 | annexin A8-like 2                                                                               | 1,600 | 2,03E-05 | GGCAACTGAGACTGGGTACCTGGAGATTCTGAAGTGCCTTTGCTGTGGTT<br>TTCAAAATAA  |
| IGJ     | immunoglobulin J polypeptide,<br>linker protein for immunoglobulin<br>alpha and mu polypeptides | 1,600 | 2,16E-04 | TTGGGTGATGTAAAACCAACTCCCTGCCACCAAAATAATTAATAATAGTCA<br>CATTGTTATC |
| HBG1    | hemoglobin, gamma A                                                                             | 1,600 | 1,34E-03 | ACTGAGCTCACTGCCCATGATGCAGAGCTTCAAGGATAGGCTTTATTCT<br>GCAAGCAATA   |



|          |                                                          |       |          |                                                                   |
|----------|----------------------------------------------------------|-------|----------|-------------------------------------------------------------------|
| LAPTM5   | lysosomal protein transmembrane 5                        | 1,590 | 3,94E-07 | CATCATAAAACAGTCCCTTCAAACACACAATTGTTCTGCTGAAGAGTTGT<br>CATCAACAAT  |
| CD36     | CD36 molecule                                            | 1,580 | 3,98E-06 | CTTTGGCTTAATGAGACTGGGACCATTGGTGATGAGAAGGCAAACATGTT<br>CAGAAGTCAA  |
| TRAF3IP3 | TRAF3 interacting protein 3                              | 1,570 | 1,67E-09 | CTGTGAAAAAGGGTTTCTATTCTCTCTGAAAGCACATGTCTGTGTTGAACA<br>TTTCAATAA  |
| LTB      | lymphotoxin beta                                         | 1,570 | 1,67E-09 | GGAAATTGATTTTGAACCTGATGAAAATAAAGAATGGAAAGCTTCAGTGC<br>TGCCGATAAA  |
| FGD3     | FYVE, RhoGEF and PH domain<br>containing 3               | 1,570 | 2,33E-09 | CCTAGCTGGACTCATGGTTCCTAAATAACCCACGCTCAGAAGCTCTGCTAG<br>GACTTACCCC |
| CD68     | CD68 molecule                                            | 1,570 | 1,18E-06 | GGGTACCCTTATTCCTCGACACGCAACTGGCTCAAAGACAATGTTATTTT<br>CCTTCCCTT   |
| HBQ1     | hemoglobin, theta 1                                      | 1,570 | 1,61E-06 | TGGAAAGGACCTTCCTGGCTTCCCCGCCACGAAGACCTACTTCTCCAC<br>CTGGACCTGA    |
| ARHGAP9  | Rho GTPase activating protein 9                          | 1,560 | 9,30E-10 | CCCTTTAAATCTCCAAATGACTGTCTCTATCTTCATGAGTGTGACTTGAG<br>GTGTTGGGA   |
| SYK      | spleen tyrosine kinase                                   | 1,560 | 3,19E-09 | ATACAGGTTATTTTTACGATCTGTTTCCAAATCCCTTTCATGTCTTCCACT<br>TCTCTGGG   |
| TYROBP   | TYRO protein tyrosine kinase<br>binding protein          | 1,560 | 4,01E-08 | GAGTGCCATCCCTGAGAGACCAGACCGCTCCCCAATACTCTCCTAAAATA<br>AACATGAAGC  |
| HLA-DRB1 | major histocompatibility complex,<br>class II, DR beta 1 | 1,560 | 5,71E-08 | TTCGTGCTGGGCCTGCTCTTCCTTGGGGCCGGGCTGTTTCATCTACTTCAG<br>GAATCAGAAA |
| APOBR    | apolipoprotein B receptor                                | 1,560 | 1,11E-07 | GCAGGCAAAACCAGACGTCTGGGAATACCGTGAACCTTAAGGAGTCTGAT<br>TCTCCGACACA |
| -        | -                                                        | 1,560 | 2,51E-04 | TATTAATAGTTGGTTGGCCTGGTATCAGCAGAAACCAGGGAGAGCCCCT<br>AAACTCCTAAT  |
| ARHGAP25 | Rho GTPase activating protein 25                         | 1,550 | 1,50E-10 | CATCTCTGAGACACAGGGGCAGAAAATGACATTCATCTTTGAGTCCTCA<br>TCCATGGAGT   |
| LSP1     | lymphocyte-specific protein 1                            | 1,550 | 1,16E-09 | CCCAGATCCAAGGGGAAACTGCAGGTCAAGGGCTGATAACGGCCATGC<br>AGGATGCTTGAT  |
| C2       | complement component 2                                   | 1,550 | 3,64E-08 | TTCTACCTCTGAATGGCCACCCTTAGACCCTGTGATCCATCCTCTCTCCTA<br>GCTGAGTAA  |
| CD84     | CD84 molecule                                            | 1,550 | 5,38E-07 | ATTATGAACGGATACATGCCTTAGGTCCGAACACAATCTGGTCATTAGC<br>GATCTGAGGA   |
| AQP9     | aquaporin 9                                              | 1,550 | 1,00E-04 | TCTACATCAAGGGATGCACCTTCAGTCAAAGTGTCAAAAAGCCCAGAATT<br>CCCCAAGGCA  |

|          |                                                                                |       |          |                                                                |
|----------|--------------------------------------------------------------------------------|-------|----------|----------------------------------------------------------------|
| HLA-DMB  | major histocompatibility complex, class II, DM beta                            | 1,540 | 1,30E-07 | GGACTATGCTGTAACCAAATTATTGTCCAAGGCTATATTTCTGGGATGAATATAATCTGA   |
| ARHGAP27 | Rho GTPase activating protein 27                                               | 1,530 | 2,39E-11 | CACAGGGGCTCATACCATATGTCTAAATATTTAAAAGTTATCAATCAAGCTAACAACCTG   |
| FAM78A   | family with sequence similarity 78, member A                                   | 1,530 | 1,67E-09 | AACCAATGCACCTACCAGGAGGCACAAGACTCTTGAAGAAGATGTAAAA TGAACCTTTTT  |
| PTAFR    | platelet-activating factor receptor                                            | 1,530 | 2,15E-08 | ATACGGTCACTGAAGTGGTTGTGCCATTCAACCAGATCCCTGGCAATTCCCTCAAAAATT   |
| RNASE1   | ribonuclease, RNase A family, 1                                                | 1,530 | 2,16E-07 | GTTAGGGCTCCTATTCAACACACACATGCTTCCCTTCTGAGTCCCATCCCTGCGTGAT     |
| CYTH4    | cytohesin 4                                                                    | 1,520 | 1,15E-09 | ACCTTGTTGGGACATCTGAGGACATCCGCAGATTCTTGTCAGCCTGTGAAC TAGGCCCTGC |
| CEBPA    | CCAAT/enhancer binding protein, alpha                                          | 1,520 | 7,21E-08 | GCCTTGTTTGTACTGTATGCCTTCAGCATTGCCTAGGAACACGAAGCACGATCAGTCCAT   |
| CTSB     | cathepsin B                                                                    | 1,520 | 3,82E-07 | TCCTTCCAGTTTCAAGTAGAATATATTCATAACCTCAATAAAGTTCTCCCTGCTCCCAA    |
| TREM1    | triggering receptor expressed on myeloid cells 1                               | 1,520 | 7,31E-06 | AACCTTACAAATGTGACAGATATCATCAGGGTTCCGGTGTTC AACATTGT CATTCTCTG  |
| HLA-DPB1 | major histocompatibility complex, class II, DP beta 1                          | 1,520 | 8,14E-06 | CATTTGCTGTGTTTCGTTAGCATCTGGCTCCAGGACAGACCTTCAACTTCC AAATTGGAT  |
| -        | -                                                                              | 1,520 | 9,42E-05 | AGGCCCTGGACAAGGGCTTGAGTGGATGGGATGGATCAGCGCTTACAA TGGTAACACAA   |
| APBB1IP  | amyloid beta precursor protein-binding, family B, member 1 interacting protein | 1,510 | 3,70E-07 | GTGATGGGAACTTCTCACTGATGTGCTCAAGTACAGGCATAACCATTAA CCCAGTAGAG   |
| HLA-DQA1 | major histocompatibility complex, class II, DQ alpha 1                         | 1,510 | 3,81E-04 | TGCGTTCAGTTGGTGCTTCCAGACACCAAGGGCCATTGTGAATCCCATCC TGGAAGGGAA  |
| TMEM37   | transmembrane protein 37                                                       | 1,500 | 4,90E-09 | AGCACGTCTGTACTTCTGTTTCAATAAGTGCTCCCTTTCTAGTCCTTTTTCT GCCCAGAA  |
| SPI1     | spleen focus forming virus proviral integration oncogene spi1                  | 1,500 | 9,23E-09 | ACCCGGGGTACTGCCTTGGGAGTCTCAAGTCCGTATGTAAATCAGATCTC CCCTCTCACC  |
| LILRB3   | leukocyte immunoglobulin-like receptor, subfamily B, member 3                  | 1,500 | 2,34E-07 | GCTGGGAACCTGTGGGACTCACCTGACTCAAAGATGACTAATATCGTCCC ATTTTGAAA   |
| CD300A   | CD300a molecule                                                                | 1,500 | 5,58E-07 | AGTTTCTCTGGACTCTTAGGTTTATTTTAAATATGAAATATAAAAACAGTTT CAAATATC  |
| HS3ST2   | heparan sulfate 3-O-sulfotransferase 2                                         | 1,500 | 1,31E-05 | GATGATAGATATTATAAGCGATGATGGTTCTGTTGCTATGAACACAGCAG TCGGTCCTG   |

|           |                                                                    |               |                 |                                                                          |
|-----------|--------------------------------------------------------------------|---------------|-----------------|--------------------------------------------------------------------------|
| CXCL1     | chemokine ligand 1                                                 | 1,500         | 3,99E-04        | CATACTGCCTTGTTAATGGTAGTTTTACAGTGTTTCTGGCTTAGAACAAA<br>GGGGCTTAA          |
| C13orf33  | chromosome 13 open reading<br>frame 33                             | -1,510        | 3,01E-06        | ATTGGACACGGCAGCGTCCTCCTTATTGAAAAACATTATGTCAGTTGGG<br>AATTTTAAAT          |
| SERPINA3  | serpin peptidase inhibitor, clade A,<br>member 3                   | -1,520        | 7,44E-05        | CATGGACTCTTCAGTCTGGAGGGTCCTGGGCCTCCTGACAGCAATAAATA<br>ATTCGTTGG          |
| ADAMTS4   | ADAM metallopeptidase with<br>thrombospondin type 1 motif, 4       | -1,530        | 7,43E-03        | AAATTGAATTCTACTATTTATGTGATCCTTTGGAGTCAGACAGATGTGGT<br>TGCATCCTA          |
| SERPINA3  | serpin peptidase inhibitor, clade A,<br>member 3                   | -1,540        | 5,95E-05        | ATAGGTGAGCTCTACCTGCCAAAGTTTTCCATCTCGAGGGACTATAACCT<br>GAACGACATA         |
| LINC00312 | long intergenic non-protein coding<br>RNA 312                      | -1,550        | 1,91E-06        | AGTGATATTTGCCTTAGGTCAGATTCTACTAGTTTAAAGCAAAACGATCTC<br>CTGGTCTGA         |
| APOD      | apolipoprotein D                                                   | -1,560        | 5,17E-04        | TCACTAATGGAAAACGGAAAGATCAAAGTGTTAAACCAGGAGTTGAGAG<br>CTGATGGAAC          |
| HPR       | haptoglobin-related protein                                        | -1,600        | 5,93E-05        | AAGCTTTGATAAGAGCTGTGCTGTGGCTGAGTATGGTGTGTATGTGAAGG<br>TGACTTCCAT         |
| CSF3      | colony stimulating factor 3                                        | -1,760        | 7,87E-03        | GGGTCCCACGAATTTGCTGGGGAATCTCGTTTTCTCTTAAGACTTTTGG<br>GACATGGTT           |
| MYOC      | myocilin, trabecular meshwork<br>inducible glucocorticoid response | -1,850        | 3,75E-03        | ATGCATTTACTACAGTTGGCTTCTAATGCTTCAGATAGAATACAGTTGGGT<br>CTCACATAA         |
| FAM150B   | family with sequence similarity 150,<br>member B                   | -1,860        | 3,47E-05        | GACTCTCCATAAGTCCTTTGAGTTTTGTATGTTGTTGACAGTTTGCAGAT<br>ATATATTCG          |
| HSPB7     | heat shock 27kDa protein family,<br>member 7                       | -1,900        | 2,86E-08        | TATATAGATGGGGTTTTTCCAATACAGCTGGTTCGTGATAAACTGCATGA<br>AACTCCTGCC         |
| <b>HP</b> | <b>haptoglobin</b>                                                 | <b>-1,960</b> | <b>2,17E-04</b> | <b>GATAAGATGTGGTTTGAAGCTGATGGGTGCCAGCCCTGCATTGCTGAGTC<br/>AATCAATAAA</b> |
| SCARA5    | scavenger receptor class A, member<br>5                            | -2,020        | 3,31E-03        | CAATATGCTTGCCACTCCTTAAATGTCCTAATGATGAGAACTCTCTTTCT<br>GACCAATTG          |
| PCP4      | Purkinje cell protein 4                                            | -2,090        | 3,40E-06        | CCCTCCTAGTCCACCTGAAAACACCAAATTCAACCATCATCTGTCAAGAA<br>ATTAAGAGAA         |
| SAA2      | serum amyloid A2                                                   | -2,170        | 2,34E-05        | CTATGTCCAGAGAAGCTGAGATATGGCATATAATAGGCATCTAATAAATG<br>CTTAAGAGGT         |
| PI16      | peptidase inhibitor 16                                             | -2,190        | 2,74E-04        | AGGGACGAGGGAAGGAAAGTAACTCCTGACTCTCCAATAAAAACCTGTC<br>CAACCTGTGGC         |
| DES       | desmin                                                             | -2,250        | 2,20E-04        | CTCCCCCTCCCCTGCTGCAGGGGCTCTGGAGAGAAACAATAAAGAGATTC<br>ACACACAAGCC        |

|         |                             |        |          |                                                                  |
|---------|-----------------------------|--------|----------|------------------------------------------------------------------|
| SAA1    | serum amyloid A1            | -2,310 | 5,47E-05 | CAGAAGCGATCAGCGATGCCAGAGAGAATATCCAGAGATTCTTTGGCCA<br>TGGTGCGGAGG |
| CXCL14  | chemokine ligand 14         | -2,430 | 3,09E-03 | ACGAAGAATAGGGTGAAAAACCTCAGAAGGGAAAACTCCAAACCAGTT<br>GGGAGACTTGTG |
| PLA2G2A | phospholipase A2, group IIA | -2,830 | 2,06E-04 | AAGAACTCTTACCATGAAGACCCTCCTACTGTTGGCAGTGATCATGATCT<br>TTGGCCTACT |

---

FC: Fold Change; "-": No matching in genebank.

**Supplementary Table S2.** Results from GO and KEGG pathway enrichment analysis for the module linked to cardiovascular and Alzheimer's disease.

| Category         | Term                                                                       | Count | p-value  |
|------------------|----------------------------------------------------------------------------|-------|----------|
| GOTERM_CC_DIRECT | GO:0034361~very-low-density lipoprotein particle                           | 17    | 1,44E-22 |
| GOTERM_CC_DIRECT | GO:0034364~high-density lipoprotein particle                               | 17    | 2,21E-21 |
| GOTERM_BP_DIRECT | GO:0042157~lipoprotein metabolic process                                   | 17    | 2,35E-16 |
| GOTERM_BP_DIRECT | GO:0008203~cholesterol metabolic process                                   | 17    | 1,45E-10 |
| GOTERM_BP_DIRECT | GO:0042632~cholesterol homeostasis                                         | 16    | 6,81E-10 |
| GOTERM_CC_DIRECT | GO:0005576~extracellular region                                            | 36    | 3,06E-08 |
| GOTERM_BP_DIRECT | GO:0043691~reverse cholesterol transport                                   | 12    | 4,00E-09 |
| GOTERM_CC_DIRECT | GO:0042627~chylomicron                                                     | 11    | 2,14E-07 |
| GOTERM_BP_DIRECT | GO:0034375~high-density lipoprotein particle remodeling                    | 11    | 1,45E-06 |
| GOTERM_BP_DIRECT | GO:0006869~lipid transport                                                 | 15    | 1,19E-05 |
| GOTERM_BP_DIRECT | GO:0006898~receptor-mediated endocytosis                                   | 18    | 8,74E-06 |
| GOTERM_CC_DIRECT | GO:0034362~low-density lipoprotein particle                                | 10    | 1,72E-05 |
| GOTERM_BP_DIRECT | GO:0070328~triglyceride homeostasis                                        | 11    | 2,49E-03 |
| GOTERM_CC_DIRECT | GO:0034366~spherical high-density lipoprotein particle                     | 8     | 1,07E-01 |
| GOTERM_BP_DIRECT | GO:0033344~cholesterol efflux                                              | 10    | 3,57E-02 |
| GOTERM_BP_DIRECT | GO:0001523~retinoid metabolic process                                      | 12    | 4,71E-01 |
| GOTERM_CC_DIRECT | GO:0072562~blood microparticle                                             | 14    | 4,53E-01 |
| GOTERM_BP_DIRECT | GO:0034372~very-low-density lipoprotein particle remodeling                | 7     | 5,79E+00 |
| GOTERM_BP_DIRECT | GO:0033700~phospholipid efflux                                             | 8     | 7,99E+00 |
| GOTERM_MF_DIRECT | GO:0008289~lipid binding                                                   | 13    | 4,18E+01 |
| GOTERM_BP_DIRECT | GO:0006629~lipid metabolic process                                         | 13    | 7,13E+01 |
| GOTERM_CC_DIRECT | GO:0005615~extracellular space                                             | 25    | 9,37E-01 |
| GOTERM_MF_DIRECT | GO:0005319~lipid transporter activity                                      | 8     | 1,72E+03 |
| GOTERM_BP_DIRECT | GO:0051006~positive regulation of lipoprotein lipase activity              | 7     | 1,73E+03 |
| GOTERM_MF_DIRECT | GO:0015485~cholesterol binding                                             | 9     | 5,62E+02 |
| GOTERM_MF_DIRECT | GO:0060228~phosphatidylcholine-sterol O-acyltransferase activator activity | 6     | 1,66E+04 |
| GOTERM_MF_DIRECT | GO:0034185~apolipoprotein binding                                          | 7     | 2,37E+03 |
| GOTERM_MF_DIRECT | GO:0017127~cholesterol transporter activity                                | 7     | 3,94E+03 |
| GOTERM_CC_DIRECT | GO:0071682~endocytic vesicle lumen                                         | 7     | 3,98E+02 |
| GOTERM_MF_DIRECT | GO:0005543~phospholipid binding                                            | 10    | 6,64E+03 |
| GOTERM_CC_DIRECT | GO:0070062~extracellular exosome                                           | 31    | 1,18E+05 |
| KEGG_PATHWAY     | hsa03320:PPAR signaling pathway                                            | 10    | 1,45E+00 |
| GOTERM_BP_DIRECT | GO:0006641~triglyceride metabolic process                                  | 8     | 1,49E+05 |
| GOTERM_BP_DIRECT | GO:0034380~high-density lipoprotein particle assembly                      | 6     | 1,58E+05 |
| GOTERM_BP_DIRECT | GO:0042158~lipoprotein biosynthetic process                                | 6     | 3,55E+04 |
| GOTERM_BP_DIRECT | GO:0010873~positive regulation of cholesterol esterification               | 6     | 3,55E+04 |
| GOTERM_BP_DIRECT | GO:0045723~positive regulation of fatty acid biosynthetic process          | 6     | 7,08E+03 |
| GOTERM_BP_DIRECT | GO:0034374~low-density lipoprotein particle remodeling                     | 6     | 1,29E+06 |
| GOTERM_BP_DIRECT | GO:0019433~triglyceride catabolic process                                  | 7     | 1,40E+06 |
| GOTERM_BP_DIRECT | GO:0010875~positive regulation of cholesterol efflux                       | 6     | 5,57E+05 |
| GOTERM_MF_DIRECT | GO:0055102~lipase inhibitor activity                                       | 5     | 1,40E+07 |
| GOTERM_BP_DIRECT | GO:0034384~high-density lipoprotein particle clearance                     | 5     | 1,43E+07 |
| GOTERM_BP_DIRECT | GO:0034382~chylomicron remnant clearance                                   | 5     | 1,43E+07 |
| GOTERM_MF_DIRECT | GO:0016209~antioxidant activity                                            | 6     | 4,14E+06 |
| GOTERM_MF_DIRECT | GO:0031210~phosphatidylcholine binding                                     | 6     | 8,92E+06 |
| GOTERM_BP_DIRECT | GO:0046470~phosphatidylcholine metabolic process                           | 5     | 1,98E+08 |
| GOTERM_MF_DIRECT | GO:0008201~heparin binding                                                 | 9     | 3,93E+08 |
| GOTERM_MF_DIRECT | GO:0005041~low-density lipoprotein receptor activity                       | 5     | 6,54E+07 |

|                  |                                                         |    |          |
|------------------|---------------------------------------------------------|----|----------|
| GOTERM_CC_DIRECT | GO:0043235~receptor complex                             | 8  | 9,12E+07 |
| GOTERM_BP_DIRECT | GO:0098869~cellular oxidant detoxification              | 7  | 9,30E+07 |
| GOTERM_BP_DIRECT | GO:0006953~acute-phase response                         | 6  | 1,51E+08 |
| GOTERM_BP_DIRECT | GO:0030301~cholesterol transport                        | 5  | 1,69E+09 |
| GOTERM_CC_DIRECT | GO:0005769~early endosome                               | 9  | 3,48E+08 |
| KEGG_PATHWAY     | hsa05143:African trypanosomiasis                        | 5  | 1,63E+11 |
| GOTERM_BP_DIRECT | GO:0002576~platelet degranulation                       | 6  | 1,96E+11 |
| GOTERM_CC_DIRECT | GO:0005905~clathrin-coated pit                          | 5  | 2,10E+11 |
| GOTERM_BP_DIRECT | GO:0050728~negative regulation of inflammatory response | 5  | 1,20E+12 |
| GOTERM_MF_DIRECT | GO:0019899~enzyme binding                               | 7  | 6,55E+10 |
| GOTERM_BP_DIRECT | GO:0006897~endocytosis                                  | 5  | 1,03E-03 |
| GOTERM_CC_DIRECT | GO:0005788~endoplasmic reticulum lumen                  | 5  | 2,50E-03 |
| GOTERM_CC_DIRECT | GO:0005783~endoplasmic reticulum                        | 9  | 2,86E-03 |
| GOTERM_CC_DIRECT | GO:0005794~Golgi apparatus                              | 9  | 3,68E-03 |
| GOTERM_CC_DIRECT | GO:0005768~endosome                                     | 5  | 4,41E-03 |
| GOTERM_CC_DIRECT | GO:0009986~cell surface                                 | 7  | 5,19E-03 |
| KEGG_PATHWAY     | hsa05010:Alzheimer's disease                            | 5  | 8,08E-03 |
| GOTERM_BP_DIRECT | GO:0042493~response to drug                             | 5  | 1,64E-02 |
| GOTERM_CC_DIRECT | GO:0030425~dendrite                                     | 5  | 1,73E-02 |
| GOTERM_MF_DIRECT | GO:0005509~calcium ion binding                          | 7  | 2,63E-02 |
| GOTERM_MF_DIRECT | GO:0042802~identical protein binding                    | 7  | 3,17E-02 |
| GOTERM_BP_DIRECT | GO:0045087~innate immune response                       | 5  | 4,92E-02 |
| GOTERM_MF_DIRECT | GO:0005515~protein binding                              | 35 | 6,98E-02 |
| GOTERM_CC_DIRECT | GO:0043231~intracellular membrane-bounded organelle     | 5  | 8,30E-02 |

---

Count represents the gene number of the secondary protein-protein interaction network involved in the corresponding term; *p*-value consists of the modified Fisher exact *p*-value for the enrichment performed.
